# Supplementary material for: The effects of T-DXd on the expression of HLA class I and chemokines CXCL9/10/11 in HER2-overexpressing gastric cancer cells
Source: PubMed Central journal article supplement (PMC8376901; doi:10.1038/s41598-021-96521-2), 2021-08-19

*Original article*

## **The effects of T-DXd on the expression of HLA class I and chemokines CXCL9/10/11 in HER2-overexpressing gastric cancer cells**

**Shotaro Nakajima,<sup>1,2</sup> Kosaku Mimura,<sup>1,3</sup> Takuro Matsumoto,<sup>1</sup> Aung Kyi Thar Min,<sup>1</sup> Misato Ito,<sup>1</sup> Hiroshi Nakano,<sup>1</sup> Prajwal Neupane,<sup>1</sup> Yasuyuki Kanke,<sup>1</sup> Hirokazu Okayama,<sup>1</sup> Motonobu Saito,<sup>1</sup> Tomoyuki Momma,<sup>1</sup> Yohei Watanabe,<sup>1</sup> Hiroyuki Hanayama,<sup>1</sup> Suguru Hayase,<sup>1</sup> Zenichiro Saze,<sup>1</sup> and Koji Kono<sup>1,†</sup>**

<sup>1</sup>*Department of Gastrointestinal Tract Surgery,*

<sup>2</sup>*Department of Obesity and Inflammation Research,*

<sup>3</sup>*Department of Blood Transfusion and Transplantation Immunology,*

*Fukushima Medical University School of Medicine, Fukushima, Japan*

**†Corresponding author: Koji Kono**

Department of Gastrointestinal Tract Surgery, Fukushima Medical University School of Medicine,

1 Hikariga-oka, Fukushima city, Fukushima 960-1295, Japan

Tel.: +81-24-547-1259; Fax.: +81-24-547-1980

E-mail: [kojikono@fmu.ac.jp](mailto:kojikono@fmu.ac.jp)

**Running title:** The effect of T-DXd on HER2-positive GC

## Supplementary Figure Legends

### **Supplementary Figure S1. The effect of trastuzumab on the expression of HLA class I in HER2-positive GC cells.**

(A) Cell surface expression of HER2 (*left*) and HLA class I (*right*) in HER2-positive GC cell lines treated with several concentrations of trastuzumab or 100 ng/ml IFN- $\gamma$  for 72 h (n=3). Representative histograms were shown. Values are shown as means  $\pm$  SEM. \* $P$  <0.05, \*\* $P$  <0.01, \*\*\* $P$  <0.001, \*\*\*\* $P$  <0.0001. (B) Western blot analysis of the indicated molecules in HER2-positive GC cell lines treated with several concentrations of trastuzumab for 72 h. Values are shown as means  $\pm$  SEM. \* $P$  <0.05, \*\*\* $P$  <0.001, \*\*\*\* $P$  <0.0001.

### **Supplementary Figure S2. The effect of irinotecan on the expression of HLA class I in HER2-positive GC cells.**

Cell surface expression of HER2 and HLA class I in HER2-positive GC cell lines treated with several concentrations of trastuzumab or 100 ng/ml IFN- $\gamma$  for 72 h (n=3). Representative histograms were shown. Values are shown as means  $\pm$  SEM. \*\*\* $P$  <0.001, \*\*\*\* $P$  <0.0001.

### **Supplementary Figure S3. The effect of T-DXd on the expression of HLA class I in HER2-negative GC cells.**

The expression of HER2 (*left*) and HLA class I (*right*) in HER2-negative GC cell lines treated with several concentrations of T-DXd or 100 ng/ml IFN- $\gamma$  for 72 h (n=3). Representative histograms were shown. Values are shown as means  $\pm$  SEM. \* $P$  <0.05, \*\*\* $P$  <0.001, \*\*\*\* $P$  <0.0001.

**Supplementary Figure S4. The effect of irinotecan on mRNA expression of *CXCL9/10/11* in HER2-positive GC cells.**

mRNA expression of *CXCL9*, *CXCL10*, and *CXCL11* in NCI-N87 cells treated with or without 10 or 50  $\mu$ M irinotecan for 72 h (n=3). Values are shown as means  $\pm$  SEM. \*\* $P < 0.05$ , \*\*\* $P < 0.001$ .

**Supplementary Figure S5. Schematic representation of the effect of T-DXd on GC.**

T-DXd moderately increases HLA class I expression in HER2-positive GC cells. T-DXd also triggers the expression of *CXCL9/10/11* in HER2-positive GC cells, which might recruit tumor-infiltrating lymphocytes into GC tissues. CXCL; C-X-C motif chemokine ligand, GC; gastric cancer, HER2; human epidermal growth factor-2, HLA; human leukocyte antigen, IFN- $\gamma$ ; interferon- $\gamma$ , T-DXd; trastuzumab deruxtecan, TIL; tumor-infiltrating lymphocytes

**Supplementary Figure S6. Full-length blots shown in figures and supplementary figures.**

# Supplementary Figure S1

**A**

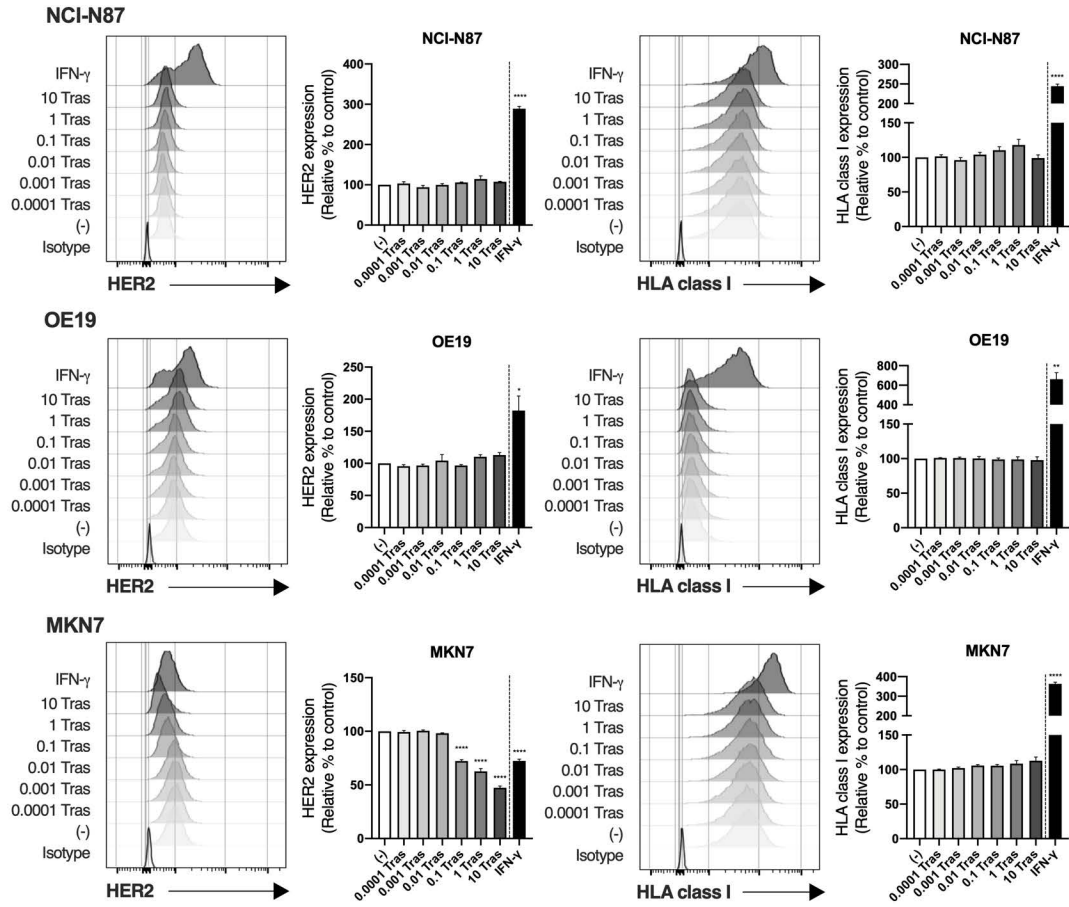

**B**

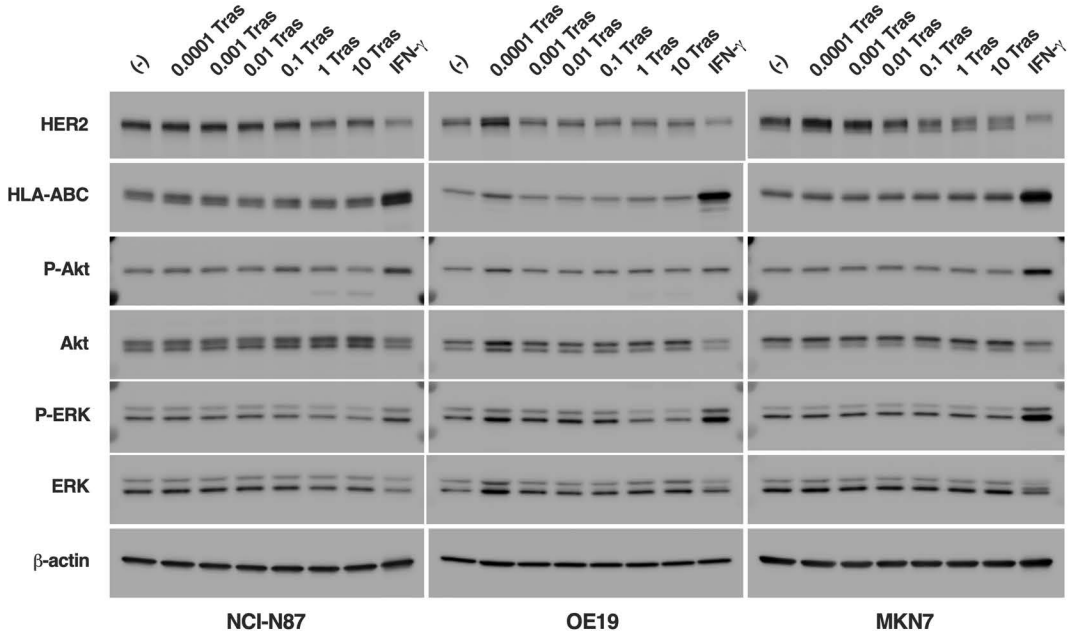

# Supplementary Figure S2

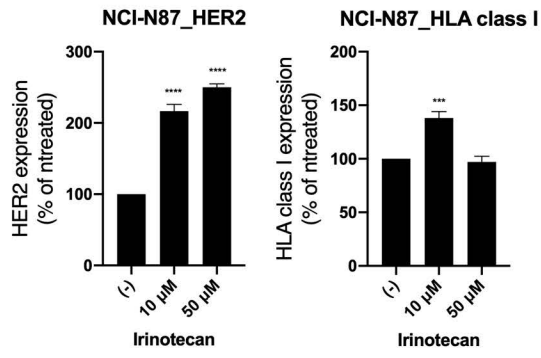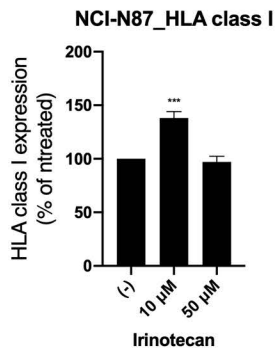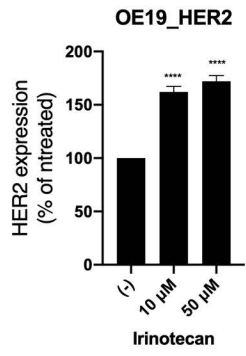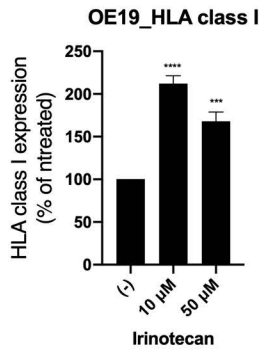

# Supplementary Figure S3

## NUGC3

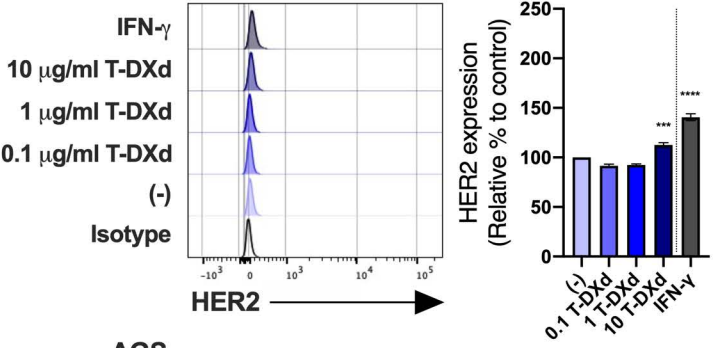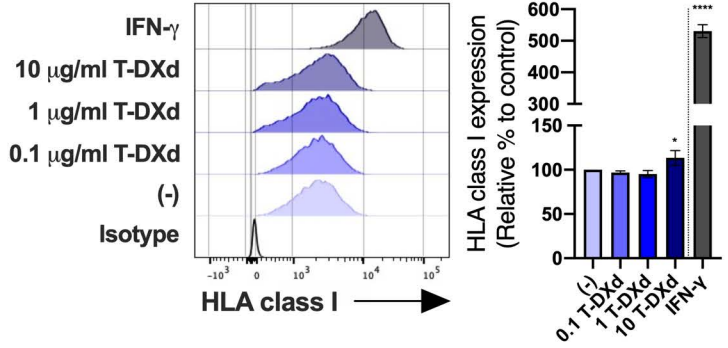

## AGS

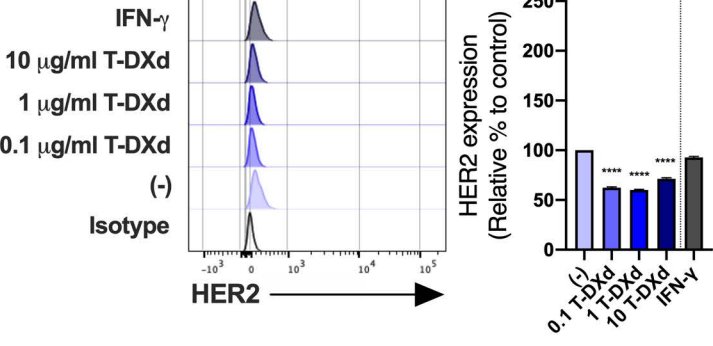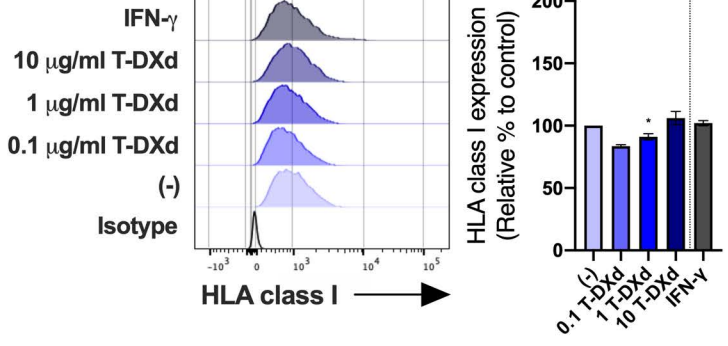

# Supplementary Figure S4

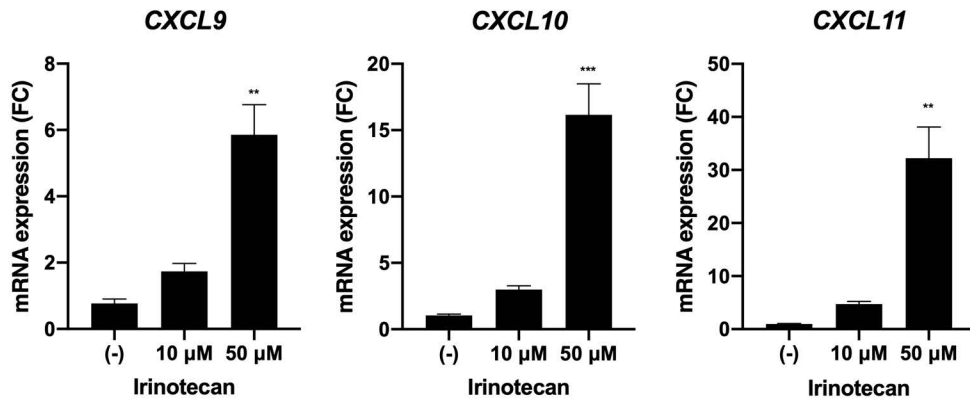

# Supplementary Figure S5

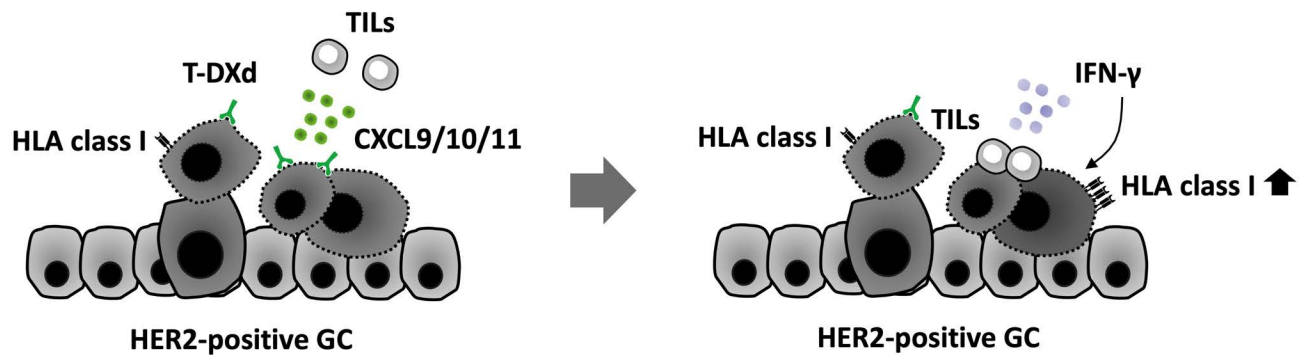



# Supplementary Figure S6-1

Fig. 2B\_NCI-N87

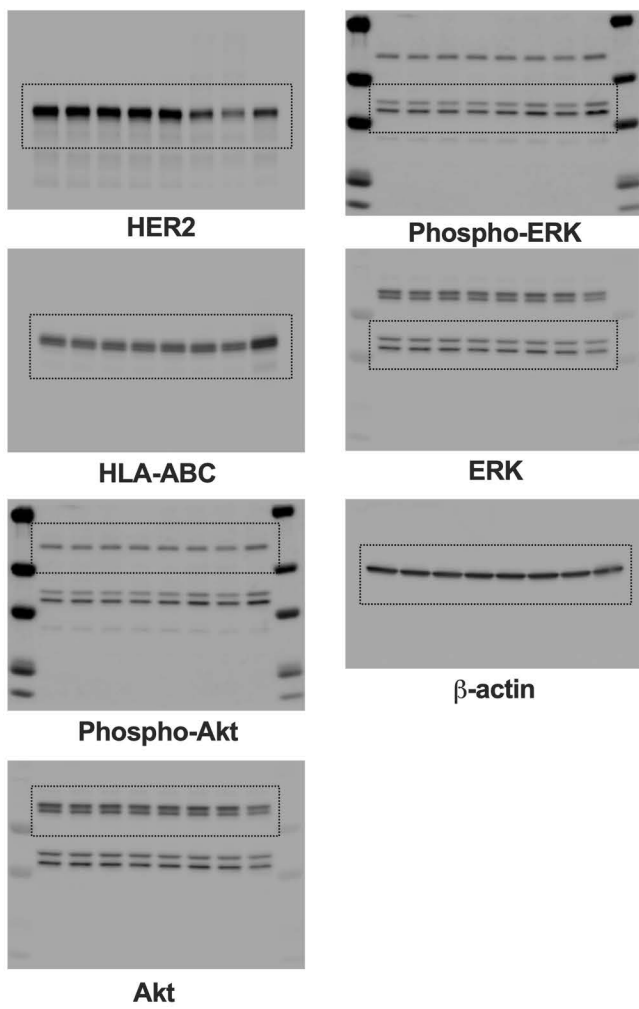

Fig. 2B\_OE19

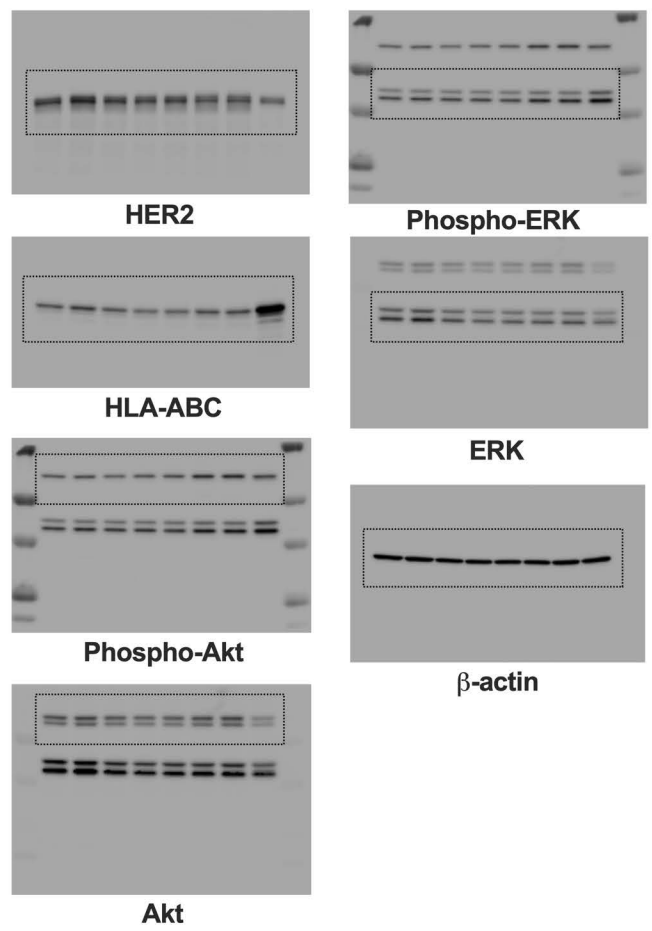

Fig. 2B\_MKN7

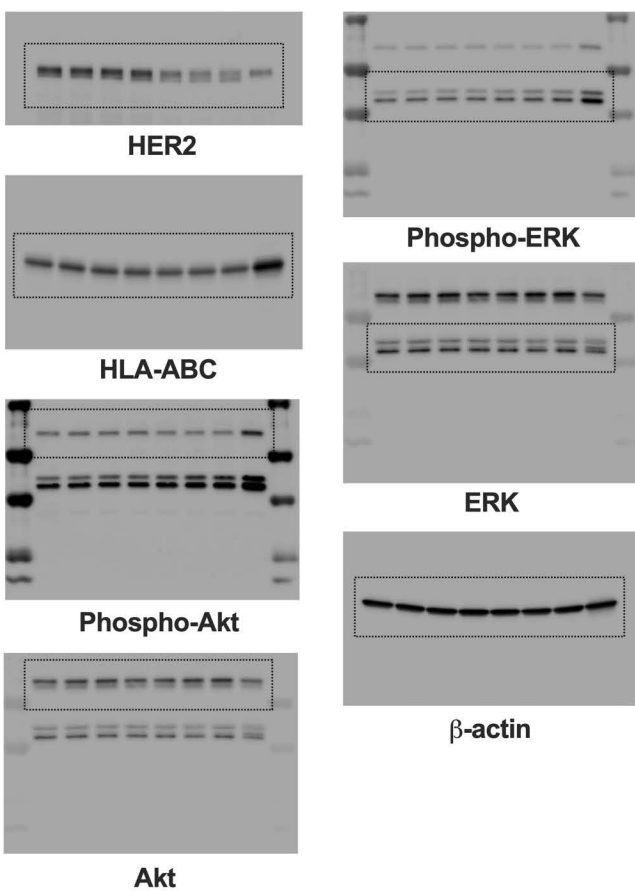

# Supplementary Figure S6-2

Supplementary Fig. S1B\_NCI-N87

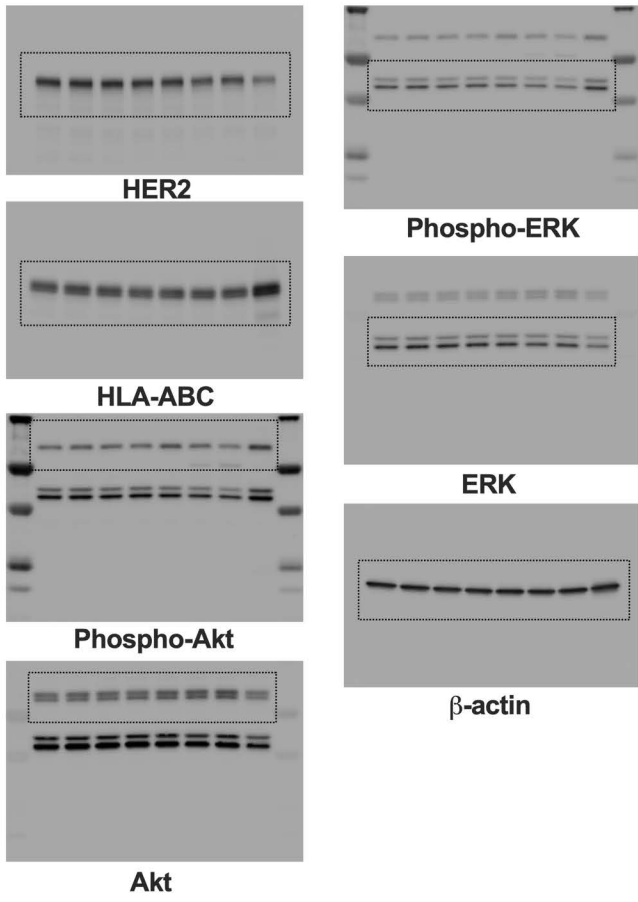

Supplementary Fig. S1B\_OE19

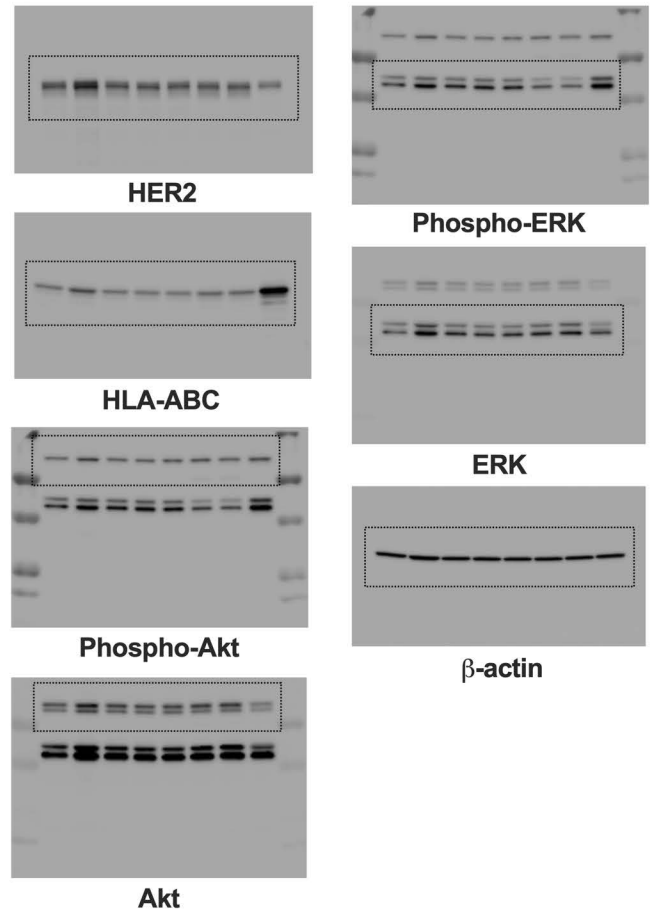

Supplementary Fig. S1B\_MKN7

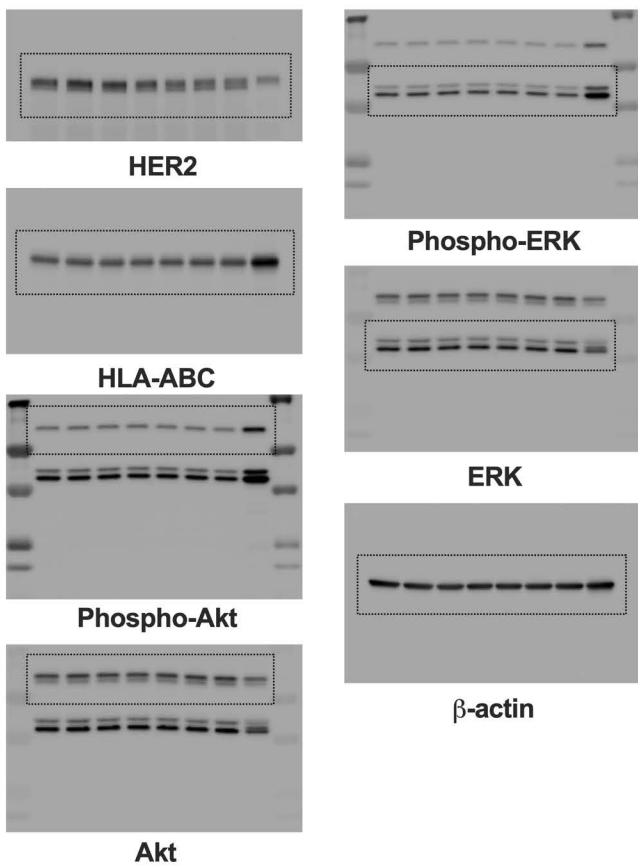

Supplement: 41598_2021_96521_MOESM1_ESM.pdf [file 41598_2021_96521_MOESM1_ESM.pdf]
